# Supplementary material for: Efficacy and Safety of Secukinumab in US Patients with Psoriatic Arthritis: A Subgroup Analysis of the Phase 3 FUTURE Studies
Source: Springer Nature journal article supplement (doi:10.1007/s40744-024-00666-1), 2024-04-16
Supplement: MOESM1 [file 26985302]

## **SUPPLEMENTARY MATERIAL**

### **Efficacy and Safety of Secukinumab in US Patients With Psoriatic Arthritis: A Subgroup Analysis of the Phase 3 FUTURE Studies**

Alan J. Kivitz, MD, CPI,<sup>1</sup> Joel M. Kremer, MD, FACP,<sup>2</sup> Clarence W. Legerton III, MD,<sup>3</sup> Luminita Pricop, MD,<sup>4</sup> Atul Singhal, MD<sup>5</sup>

<sup>1</sup>Altoona Center for Clinical Research/Altoona Arthritis and Osteoporosis Center, Duncansville, PA, USA; <sup>2</sup>The Center for Rheumatology, Albany, NY, USA; <sup>3</sup>Low Country Rheumatology/Articularis Healthcare, North Charleston, SC, USA; <sup>4</sup>Novartis Pharmaceuticals Corporation, East Hanover, NJ, USA; <sup>5</sup>Southwest Rheumatology, Dallas, TX, USA

#### **Corresponding author:**

Alan J. Kivitz, MD, CPI,

Email: [ajkivitz@yahoo.com](mailto:ajkivitz@yahoo.com)

**Supplementary Table S1.** Baseline characteristics for US and non-US patients in the FUTURE

2-5 trials

| <b>Characteristic</b>                      | <b>US<br/>(n = 279)</b> | <b>Non-US<br/>(n = 1770)</b> |
|--------------------------------------------|-------------------------|------------------------------|
| Age, mean (SD), years                      | 51.6 (12.6)             | 48.5 (12.2)                  |
| Sex, n (%)                                 |                         |                              |
| Male                                       | 124 (44.4)              | 851 (48.1)                   |
| Female                                     | 155 (55.6)              | 919 (51.9)                   |
| Race, n (%)                                |                         |                              |
| White                                      | 256 (91.8)              | 1576 (89.0)                  |
| Asian                                      | 3 (1.1)                 | 129 (7.3)                    |
| Black or African American                  | 5 (1.8)                 | 2 (0.1)                      |
| American Indian or Alaska Native           | 2 (0.7)                 | 12 (0.7)                     |
| Other                                      | 12 (4.3)                | 47 (2.7)                     |
| Unknown                                    | 1 (0.4)                 | 3 (0.2)                      |
| Weight, mean (SD), kg                      | 92.0 (21.3)             | 83.5 (18.7)                  |
| BMI, mean (SD), kg/m <sup>2</sup>          | 32.3 (7.0)              | 29.1 (5.9)                   |
| Time since PsA diagnosis, mean (SD), years | 7.0 (8.3)               | 6.7 (7.5)                    |
| Prior TNFi therapies, n (%)                |                         |                              |
| 0                                          | 125 (44.8)              | 1311 (74.1)                  |
| 1                                          | 88 (31.5)               | 266 (15.0)                   |
| ≥2                                         | 66 (23.7)               | 193 (10.9)                   |
| Methotrexate use at randomization, n (%)   | 83 (29.7)               | 928 (52.4)                   |

|                                           |             |             |
|-------------------------------------------|-------------|-------------|
| Disease characteristics, n (%)            |             |             |
| Psoriasis affecting $\geq 3\%$ of BSA     | 119 (42.7)  | 898 (50.7)  |
| Presence of enthesitis                    | 195 (69.9)  | 1089 (61.5) |
| Presence of dactylitis                    | 108 (38.7)  | 626 (35.4)  |
| Disease and QOL scores, mean (SD)         |             |             |
| TJC78                                     | 25.2 (17.8) | 20.6 (15.8) |
| SJC76                                     | 13.7 (11.7) | 10.5 (8.8)  |
| DAS28-CRP score                           | 4.9 (1.1)   | 4.6 (1.0)   |
| HAQ-DI score                              | 1.2 (0.6)   | 1.2 (0.6)   |
| PsA pain, VAS 0-100 mm                    | 53.5 (23.4) | 55.0 (23.0) |
| Patient global assessment, VAS 0-100 mm   | 55.5 (22.8) | 57.5 (21.5) |
| Physician global assessment, VAS 0-100 mm | 53.2 (17.9) | 55.6 (18.3) |

BMI, body mass index; BSA, body surface area; DAS28-CRP, Disease Activity Score 28-joint count using C-reactive protein; DAS28-ESR, Disease Activity Score 28-joint count using erythrocyte sedimentation rate; HAQ-DI, Health Assessment Questionnaire Disability Index; LD, loading dose; PsA, psoriatic arthritis; QOL, quality of life; SJC76, swollen joint count of 76 joints; TJC78, tender joint count of 78 joints; TNFi, tumor necrosis factor inhibitor; VAS, visual analog scale.

**Supplementary Table S2.** Treatment-emergent adverse events up to Week 16 occurring in  $\geq 3\%$  of US patients

|                                          | Secukinumab        |                    |                              | Placebo  |
|------------------------------------------|--------------------|--------------------|------------------------------|----------|
|                                          | 300 mg<br>(n = 72) | 150 mg<br>(n = 83) | 150 mg,<br>no LD<br>(n = 34) | (n = 90) |
| <b>Adverse events by patient, n (%)</b>  |                    |                    |                              |          |
| <b>Upper respiratory tract infection</b> | 4 (5.6)            | 8 (9.6)            | 3 (8.8)                      | 9 (10.0) |
| <b>Arthralgia</b>                        | 3 (4.2)            | 1 (1.2)            | 1 (2.9)                      | 2 (2.2)  |
| <b>Cough</b>                             | 3 (4.2)            | 2 (2.4)            | 1 (2.9)                      | 1 (1.1)  |
| <b>Hematuria</b>                         | 3 (4.2)            | 0                  | 1 (2.9)                      | 1 (1.1)  |
| <b>Hypertension</b>                      | 3 (4.2)            | 0                  | 1 (2.9)                      | 5 (5.6)  |
| <b>Oropharyngeal pain</b>                | 3 (4.2)            | 1 (1.2)            | 1 (2.9)                      | 1 (1.1)  |
| <b>Headache</b>                          | 2 (2.8)            | 1 (1.2)            | 0                            | 5 (5.6)  |
| <b>Sinusitis</b>                         | 2 (2.8)            | 5 (6.0)            | 1 (2.9)                      | 2 (2.2)  |
| <b>Diarrhea</b>                          | 1 (1.4)            | 3 (3.6)            | 2 (5.9)                      | 0        |
| <b>Nasopharyngitis</b>                   | 1 (1.4)            | 2 (2.4)            | 3 (8.8)                      | 7 (7.8)  |
| <b>Nausea</b>                            | 1 (1.4)            | 6 (7.2)            | 0                            | 6 (6.7)  |
| <b>Urinary tract infection</b>           | 1 (1.4)            | 3 (3.6)            | 1 (2.9)                      | 3 (3.3)  |
| <b>Fall</b>                              | 0                  | 0                  | 3 (8.8)                      | 1 (1.1)  |
| <b>Hypercholesterolemia</b>              | 0                  | 3 (3.6)            | 0                            | 2 (2.2)  |
| <b>Vomiting</b>                          | 0                  | 3 (3.6)            | 0                            | 0        |

LD, loading dose.

**Supplementary Fig. S1 Study design.**

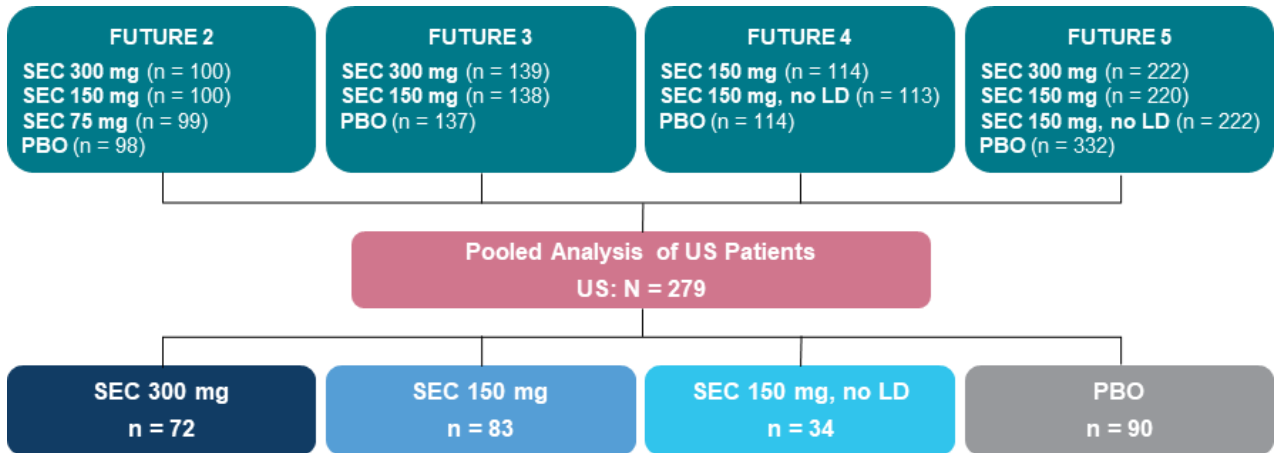

LD, loading dose; PBO, placebo; SEC, secukinumab.

**Supplementary Fig. S2** Achievement of individual MDA components among US patients at Week 16.<sup>a</sup>

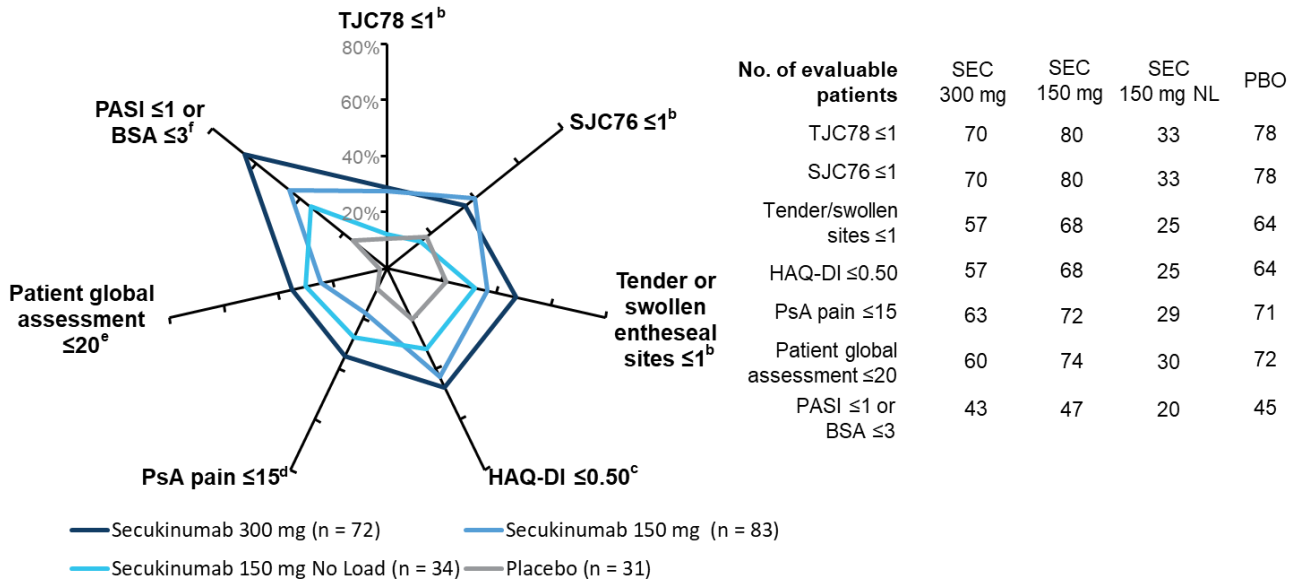

BSA, body surface area; HAQ-DI, Health Assessment Questionnaire-Disability Index; MDA, minimal disease activity; PASI, Psoriasis Area and Severity Index; PBO, placebo; PsA, psoriatic arthritis; SEC, secukinumab; SJC76, swollen joint count of 76 joints; TJC78, tender joint count of 78 joints.

<sup>a</sup> In these radar plots, greater distance from the origin corresponds to a greater proportion of patients achieving clinical response.

<sup>b</sup> Among patients with count >1 at baseline.

<sup>c</sup> Among patients with baseline HAQ-DI >0.5.

<sup>d</sup> Among patients with baseline PsA pain >15.

<sup>e</sup> Among patients with baseline patient global assessment >20.

<sup>f</sup> Among patients with baseline PASI >1 or BSA >3%.

**Supplementary Fig. S3** Radiographic progression among US patients at Week 24 as determined by the proportion of patients with vdH-mTSS  $\leq 0$  and by mean change from baseline in vdH-mTSS.

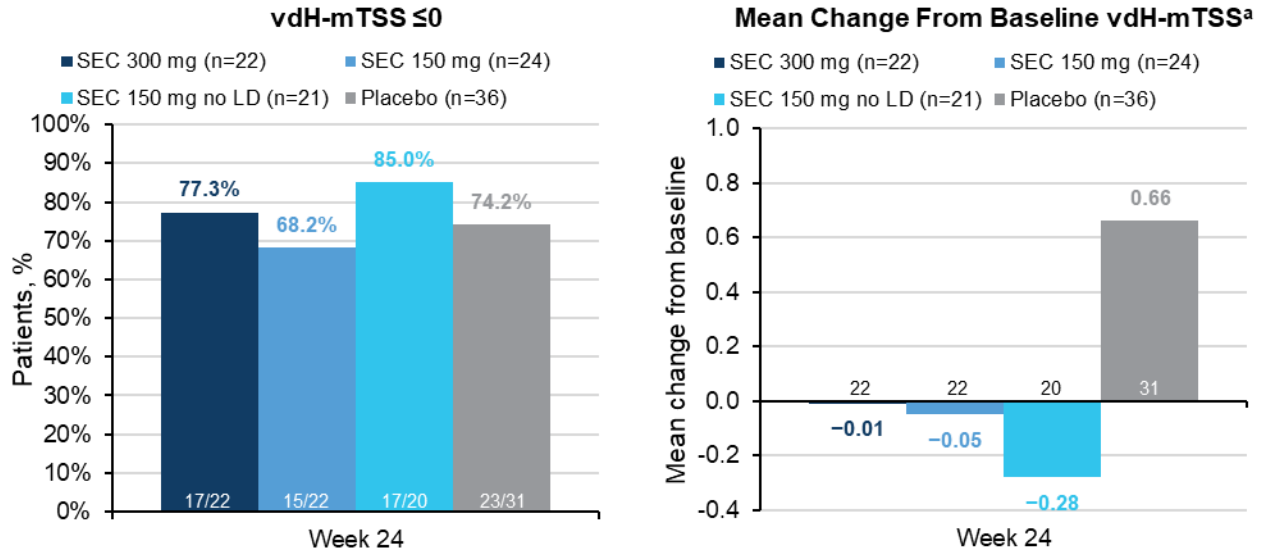

PBO, placebo; SEC, secukinumab; vdH-mTSS, van der Heijde modified total Sharp score.

<sup>a</sup> Numbers of evaluable patients for each group at Week 24 are displayed above the x-axis.
